# Supplementary material
Source: HighWire-hosted journal article supplement (https://gut.bmj.com/content/70/3/456)
Supplement: inline-supplementary-material-1 [file inline-supplementary-material-1.pdf]

**Supplementary Table 1. Characteristics of Included Eligible Studies.**

| Author                    | Country and setting   | Timeframe of study recruitment | Diagnosis of GORD            | Criteria Used to define gastro-oesophageal symptoms                               | Weekly symptoms assessed | Endoscopically suspected and/or histologically diagnosed BO                           | Sample size | Mean age (years) | Proportion of males (%) | Number with BO According to Definition Used (%) | Proportion of histologically confirmed BO among endoscopically suspected cases (%) |
|---------------------------|-----------------------|--------------------------------|------------------------------|-----------------------------------------------------------------------------------|--------------------------|---------------------------------------------------------------------------------------|-------------|------------------|-------------------------|-------------------------------------------------|------------------------------------------------------------------------------------|
| <b>Johnston 1996 [16]</b> | USA, tertiary care    | n/a                            | Self-completed questionnaire | Presence of heartburn according to a questionnaire                                | No                       | Specialised intestinal metaplasia on biopsy                                           | 104         | n/a              | n/a                     | 14 (13.5)                                       | Not applicable                                                                     |
| <b>Clark 1997 [17]</b>    | USA, tertiary care    | 1991-1995                      | Clinical assessment          | Presence of heartburn and/or regurgitation assessed clinically prior to endoscopy | No                       | Specialised intestinal metaplasia on biopsy                                           | 241         | 49.1             | 62.2                    | 70 (29)                                         | Not applicable                                                                     |
| <b>Blustein 1998 [18]</b> | Canada, tertiary care | 1994                           | Clinical assessment          | Presence of heartburn and/or regurgitation assessed clinically prior to endoscopy | No                       | Specialised intestinal metaplasia on biopsy                                           | 742         | 50               | 48                      | 47 (6.3)                                        | Not applicable                                                                     |
| <b>Csendes 1998 [19]</b>  | Chile, tertiary care  | 1995-1996                      | Clinical assessment          | Presence of heartburn and/or regurgitation assessed clinically prior to endoscopy | Yes                      | Columnar-lined oesophagus at endoscopy<br>Specialised intestinal metaplasia on biopsy | 372         | 49               | 39.2                    | 182 (48.9)<br><br>50 (13.4)                     | 27.5                                                                               |

|                            |                                      |           |                                      |                                                                                   |     |                                                                                       |     |      |      |                            |                |
|----------------------------|--------------------------------------|-----------|--------------------------------------|-----------------------------------------------------------------------------------|-----|---------------------------------------------------------------------------------------|-----|------|------|----------------------------|----------------|
| <b>Hirota 1999 [20]</b>    | USA, tertiary care                   | 1995-1996 | Self-completed questionnaire         | Presence of heartburn according to a questionnaire                                | No  | Specialised intestinal metaplasia on biopsy                                           | 131 | n/a  | n/a  | 13 (9.9)                   | Not applicable |
| <b>Csendes 2000 [21]</b>   | Chile, tertiary care                 | 1993-1995 | Clinical assessment                  | Presence of heartburn and/or regurgitation assessed clinically prior to endoscopy | Yes | Columnar-lined oesophagus at endoscopy<br>Specialised intestinal metaplasia on biopsy | 376 | 49   | 41.5 | 88 (23.4)<br><br>43 (11.4) | 48.9           |
| <b>Pieramico 2000 [22]</b> | Italy, secondary care                | 1998-1999 | Clinical assessment                  | Presence of heartburn and/or regurgitation assessed clinically prior to endoscopy | Yes | Specialised intestinal metaplasia on biopsy                                           | 142 | n/a  | n/a  | 20 (14.1)                  | Not applicable |
| <b>Gerson 2001 [23]</b>    | USA, tertiary care                   | n/a       | Self-completed questionnaire         | Presence of heartburn and/or regurgitation according to a validated questionnaire | No  | Specialised intestinal metaplasia on biopsy                                           | 517 | 52.5 | 65   | 99 (19.1)                  | Not applicable |
| <b>Mantynen 2002 [24]</b>  | Finland, secondary and tertiary care | 1996      | Interview-administered questionnaire | Presence of heartburn and/or regurgitation according to a questionnaire           | No  | Specialised intestinal metaplasia on biopsy                                           | 760 | n/a  | n/a  | 11 (1.4)                   | Not applicable |

|                                      |                                              |           |                                      |                                                                                       |     |                                             |      |      |      |            |                |
|--------------------------------------|----------------------------------------------|-----------|--------------------------------------|---------------------------------------------------------------------------------------|-----|---------------------------------------------|------|------|------|------------|----------------|
| <b>Romero 2002 [25]</b>              | USA, tertiary care                           | 1998-1999 | Self-completed questionnaire         | Presence of heartburn and/or regurgitation according to Reflux symptoms questionnaire | Yes | Specialised intestinal metaplasia on biopsy | 200  | 51   | 63   | 18 (9)     | Not applicable |
| <b>Caum 2003 [26]</b>                | Brazil, tertiary care                        | 2002      | Interview-administered questionnaire | Presence of heartburn and/or regurgitation according to a questionnaire               | No  | Specialised intestinal metaplasia on biopsy | 402  | 50.1 | 32.6 | 15 (3.7)   | Not applicable |
| <b>Rex (any frequency) 2003 [27]</b> | USA, tertiary care                           | n/a       | Self-completed questionnaire         | Presence of heartburn according to Reflux Symptoms Questionnaire                      | No  | Specialised intestinal metaplasia on biopsy | 363  | n/a  | n/a  | 30 (8.3)   | Not applicable |
| <b>Rex (weekly) 2003 [27]</b>        | USA, tertiary care                           | n/a       | Self-completed questionnaire         | Presence of heartburn according to Reflux Symptoms Questionnaire                      | Yes | Specialised intestinal metaplasia on biopsy | 150  | n/a  | n/a  | 14 (9.3)   | Not applicable |
| <b>Ahmed 2004 [28]</b>               | Sudan, tertiary care                         | 2000      | Clinical assessment                  | Presence of heartburn assessed clinically prior to endoscopy                          | No  | Specialised intestinal metaplasia on biopsy | 105  | n/a  | n/a  | 11 (10.5)  | Not applicable |
| <b>Kulig 2004 [29]</b>               | Germany, Austria, Switzerland, tertiary care | 2000-2001 | Interview-administered questionnaire | Presence of heartburn and/or regurgitation according to Reflux Disease Questionnaire  | Yes | Specialised intestinal metaplasia on biopsy | 6215 | 54   | 53   | 702 (11.3) | Not applicable |

|                           |                         |           |                              |                                                                                |     |                                                                                       |      |      |      |                       |                |
|---------------------------|-------------------------|-----------|------------------------------|--------------------------------------------------------------------------------|-----|---------------------------------------------------------------------------------------|------|------|------|-----------------------|----------------|
| <b>Rajendra 2004 [30]</b> | Malaysia, tertiary care | 1997-2000 | Clinical assessment          | Presence of heartburn and/or regurgitation assessed by GP or outpatient clinic | Yes | Specialised intestinal metaplasia on biopsy                                           | 661  | n/a  | n/a  | 76 (11.5)             | Not applicable |
| <b>Toruner 2004 [31]</b>  | Turkey, tertiary care   | 2001      | Self-completed questionnaire | Presence of heartburn according to a questionnaire                             | No  | Specialised intestinal metaplasia on biopsy                                           | 61   | n/a  | 34.4 | 3 (4.9)               | Not applicable |
| <b>Wo 2004 [32]</b>       | USA, tertiary care      | n/a       | Self-completed questionnaire | Presence of heartburn according to a questionnaire                             | Yes | Specialised intestinal metaplasia on biopsy                                           | 82   | 46   | 32   | 13 (15.9)             | Not applicable |
| <b>Bafandeh 2005 [33]</b> | Iran, tertiary care     | 2001-2003 | Clinical assessment          | Presence of heartburn assessed by outpatient clinic                            | Yes | Columnar-lined oesophagus at endoscopy<br>Specialised intestinal metaplasia on biopsy | 1248 | 45   | 60.1 | 104 (8.3)<br>30 (2.4) | 28.8           |
| <b>Bajbouj 2005 [34]</b>  | Germany, tertiary care  | n/a       | Self-completed questionnaire | Presence of heartburn according to a questionnaire                             | Yes | Specialised intestinal metaplasia on biopsy                                           | 590  | 50.2 | 53   | 15 (2.5)              | Not applicable |

|                                            |                                    |           |                              |                                                                                         |     |                                                                                       |     |      |      |                      |                |
|--------------------------------------------|------------------------------------|-----------|------------------------------|-----------------------------------------------------------------------------------------|-----|---------------------------------------------------------------------------------------|-----|------|------|----------------------|----------------|
| <b>Kim 2005 [35]</b>                       | Korea, tertiary care               | n/a       | Clinical assessment          | Presence of heartburn and/or regurgitation assessed clinically prior to endoscopy       | No  | Specialised intestinal metaplasia on biopsy                                           | 164 | n/a  | n/a  | 7 (4.3)              | Not applicable |
| <b>Ronkainen (any frequency) 2005 [36]</b> | Sweden, primary and secondary care | 1999-2001 | Postal questionnaire         | Presence of heartburn and/or regurgitation according to Abdominal Symptom Questionnaire | No  | Columnar-lined oesophagus at endoscopy<br>Specialised intestinal metaplasia on biopsy | 400 | 52.7 | 45.3 | 41 (10.3)<br>9 (2.3) | 22.0           |
| <b>Ronkainen (weekly) 2005 [36]</b>        | Sweden, primary and secondary care | 1999-2001 | Postal questionnaire         | Presence of heartburn and/or regurgitation according to Abdominal Symptom Questionnaire | Yes | Columnar-lined oesophagus at endoscopy<br>Specialised intestinal metaplasia on biopsy | 200 | n/a  | n/a  | 28 (14)<br>5 (2.5)   | 17.9           |
| <b>Westhoff 2005 [37]</b>                  | USA, tertiary care                 | 1999-2002 | Self-completed questionnaire | Presence of heartburn and/or regurgitation according to GerdQ Questionnaire             | Yes | Specialised intestinal metaplasia on biopsy                                           | 378 | 56   | 94   | 50 (13.2)            | Not applicable |

|                            |                        |           |                              |                                                                             |     |                                                                                       |     |      |      |                       |                |
|----------------------------|------------------------|-----------|------------------------------|-----------------------------------------------------------------------------|-----|---------------------------------------------------------------------------------------|-----|------|------|-----------------------|----------------|
| <b>Shapiro 2006 [38]</b>   | USA, tertiary care     | n/a       | Clinical assessment          | Presence of heartburn and/or regurgitation assessed GP or outpatient clinic | Yes | Specialised intestinal metaplasia on biopsy                                           | 121 | 53.7 | 63.6 | 23 (19)               | Not applicable |
| <b>Ward 2006 [39]</b>      | USA, tertiary care     | n/a       | Self-completed questionnaire | Presence of heartburn and/or regurgitation according to a questionnaire     | Yes | Specialised intestinal metaplasia on biopsy                                           | 106 | n/a  | 60.4 | 21 (19.8)             | Not applicable |
| <b>Johansson 2007 [40]</b> | Sweden, secondary care | 1997-1999 | Self-completed questionnaire | Presence of heartburn and/or regurgitation according to a questionnaire     | Yes | Columnar-lined oesophagus at endoscopy<br>Specialised intestinal metaplasia on biopsy | 224 | n/a  | n/a  | 43 (19.2)<br>10 (4.5) | 23.3           |
| <b>Bayrakci 2008 [41]</b>  | Turkey, tertiary care  | 2004-2005 | Self-completed questionnaire | Presence of heartburn and/or regurgitation according to GerdQ Questionnaire | Yes | Columnar-lined oesophagus at endoscopy<br>Specialised intestinal metaplasia on biopsy | 160 | 48   | 40   | 3 (1.9)<br>1 (0.6)    | 33.3           |

|                                                 |                           |           |                                 |                                                                                            |     |                                                                                                    |      |      |      |                         |                |
|-------------------------------------------------|---------------------------|-----------|---------------------------------|--------------------------------------------------------------------------------------------|-----|----------------------------------------------------------------------------------------------------|------|------|------|-------------------------|----------------|
| <b>Hak 2008 [42]</b>                            | Egypt,<br>tertiary care   | n/a       | Clinical<br>assessment          | Presence of heartburn<br>and/or regurgitation<br>assessed clinically prior<br>to endoscopy | Yes | Specialised intestinal<br>metaplasia on biopsy                                                     | 91   | 36   | 65.9 | 9 (9.9)                 | Not applicable |
| <b>Koek 2008 [43]</b>                           | Belgium,<br>tertiary care | n/a       | Self-completed<br>questionnaire | Presence of heartburn<br>and/or regurgitation<br>according to a<br>questionnaire           | No  | Specialised intestinal<br>metaplasia on biopsy                                                     | 422  | 46.8 | 48   | 30 (7.1)                | Not applicable |
| <b>Tseng 2008 [44]</b>                          | Taiwan,<br>tertiary care  | 2003-2006 | Self-completed<br>questionnaire | Presence of heartburn<br>and/or regurgitation<br>according to a validated<br>questionnaire | Yes | Columnar-lined<br>oesophagus at<br>endoscopy                                                       | 3171 | n/a  | n/a  | 12 (0.4)                | Not applicable |
| <b>Zagari (any<br/>frequency) 2008<br/>[45]</b> | Italy, tertiary<br>care   | 2000-2004 | Self-completed<br>questionnaire | Presence of heartburn<br>and/or regurgitation<br>according to a validated<br>questionnaire | No  | Columnar-lined<br>oesophagus at<br>endoscopy<br><br>Specialised intestinal<br>metaplasia on biopsy | 458  | 58.2 | 47.6 | 19 (4.1)<br><br>7 (1.5) | 36.8           |

|                                  |                                    |           |                                      |                                                                                   |     |                                                                                       |      |      |      |                         |                |
|----------------------------------|------------------------------------|-----------|--------------------------------------|-----------------------------------------------------------------------------------|-----|---------------------------------------------------------------------------------------|------|------|------|-------------------------|----------------|
| <b>Zagari (weekly) 2008 [45]</b> | Italy, tertiary care               | 2000-2004 | Self-completed questionnaire         | Presence of heartburn and/or regurgitation according to a validated questionnaire | Yes | Columnar-lined oesophagus at endoscopy<br>Specialised intestinal metaplasia on biopsy | 245  | 57.9 | 49.4 | 15 (6.1)<br><br>7 (2.9) | 46.7           |
| <b>Fouad 2009 [46]</b>           | Egypt, tertiary care               | 2006-2008 | Self-completed questionnaire         | Presence of heartburn and/or regurgitation according to a questionnaire           | Yes | Specialised intestinal metaplasia on biopsy                                           | 1000 | 38.8 | 85.3 | 73 (7.3)                | Not applicable |
| <b>Odemis 2009 [47]</b>          | Turkey, tertiary care              | 2001-2002 | Interview-administered questionnaire | Presence of heartburn and/or regurgitation according to a questionnaire           | No  | Specialised intestinal metaplasia on biopsy                                           | 351  | n/a  | n/a  | 6 (1.7)                 | Not applicable |
| <b>Park 2009 [48]</b>            | Korea, secondary and tertiary care | 2006      | Interview-administered questionnaire | Presence of heartburn according to a questionnaire                                | No  | Specialised intestinal metaplasia on biopsy                                           | 5534 | n/a  | n/a  | 55 (1)                  | Not applicable |
| <b>Peng 2009 [49]</b>            | China, tertiary care               | 2006-2007 | Interview-administered questionnaire | Presence of heartburn and/or regurgitation according to a questionnaire           | No  | Specialised intestinal metaplasia on biopsy                                           | 310  | 42   | 52.6 | 16 (5.2)                | Not applicable |



|                                              |                                             |      |                                             |                                                                                            |     |                                                                                                |     |      |      |                          |                |
|----------------------------------------------|---------------------------------------------|------|---------------------------------------------|--------------------------------------------------------------------------------------------|-----|------------------------------------------------------------------------------------------------|-----|------|------|--------------------------|----------------|
| <b>Kuo 2010 [50]</b>                         | Taiwan,<br>tertiary care                    | 2007 | Self-completed<br>questionnaire             | Presence of heartburn<br>and/or regurgitation<br>according to GerdQ<br>Questionnaire       | Yes | Columnar-lined<br>oesophagus at<br>endoscopy<br>Specialised intestinal<br>metaplasia on biopsy | 344 | 49.8 | 55.5 | 21 (6.1)<br><br>13 (3.8) | 61.9           |
| <b>Lee (any<br/>frequency) 2010<br/>[51]</b> | Korea,<br>secondary<br>and tertiary<br>care | 2006 | Interview-<br>administered<br>questionnaire | Presence of regurgitation<br>according to a validated<br>questionnaire                     | No  | Specialised intestinal<br>metaplasia on biopsy                                                 | 262 | n/a  | n/a  | 7 (2.7)                  | Not applicable |
| <b>Lee (weekly) 2010<br/>[51]</b>            | Korea,<br>secondary<br>and tertiary<br>care | 2006 | Interview-<br>administered<br>questionnaire | Presence of regurgitation<br>according to a validated<br>questionnaire                     | Yes | Specialised intestinal<br>metaplasia on biopsy                                                 | 120 | n/a  | n/a  | 4 (3.3)                  | Not applicable |
| <b>Xiong 2010 [52]</b>                       | China,<br>tertiary care                     | 2007 | Clinical<br>assessment                      | Presence of heartburn<br>and/or regurgitation<br>assessed clinically prior<br>to endoscopy | No  | Specialised intestinal<br>metaplasia on biopsy                                                 | 139 | n/a  | n/a  | 3 (2.2)                  | Not applicable |

|                                      |                      |           |                              |                                                                             |     |                                                                                       |      |      |      |                              |                |
|--------------------------------------|----------------------|-----------|------------------------------|-----------------------------------------------------------------------------|-----|---------------------------------------------------------------------------------------|------|------|------|------------------------------|----------------|
| <b>Mathew 2011 [53]</b>              | India, tertiary care | 2006-2008 | Clinical assessment          | Presence of heartburn and/or regurgitation according to Montreal definition | Yes | Columnar-lined oesophagus at endoscopy<br>Specialised intestinal metaplasia on biopsy | 278  | 41   | 53.6 | 46 (16.5)<br><br>25 (9)      | 54.3           |
| <b>Zou (any frequency) 2011 [54]</b> | China, tertiary care | 2007-2008 | Self-completed questionnaire | Presence of heartburn and/or regurgitation according to Montreal definition | No  | Columnar-lined oesophagus at endoscopy                                                | 235  | n/a  | n/a  | 2 (0.9)                      | Not applicable |
| <b>Zou (weekly) 2011 [54]</b>        | China, tertiary care | 2007-2008 | Self-completed questionnaire | Presence of heartburn and/or regurgitation according to Montreal definition | Yes | Columnar-lined oesophagus at endoscopy                                                | 48   | n/a  | n/a  | 1 (2.1)                      | Not applicable |
| <b>Balasubramanian 2012 [55]</b>     | USA, tertiary care   | 2000-2011 | Self-completed questionnaire | Presence of heartburn and/or regurgitation according to GerdQ Questionnaire | No  | Columnar-lined oesophagus at endoscopy<br>Specialised intestinal metaplasia on biopsy | 1058 | 57.2 | 91.4 | 247 (23.3)<br><br>150 (14.2) | 60.7           |

|                                       |                                     |           |                                      |                                                                                   |     |                                                                                       |     |      |      |                        |                |
|---------------------------------------|-------------------------------------|-----------|--------------------------------------|-----------------------------------------------------------------------------------|-----|---------------------------------------------------------------------------------------|-----|------|------|------------------------|----------------|
| <b>Sharif 2014 [56]</b>               | Iran, tertiary care                 | n/a       | Clinical assessment                  | Presence of heartburn and/or regurgitation according to Montreal definition       | Yes | Specialised intestinal metaplasia on biopsy                                           | 736 | 48.9 | 55.8 | 34 (4.6)               | Not applicable |
| <b>Wani 2014 [57]</b>                 | India, tertiary care                | 2010-2012 | Clinical assessment                  | Presence of heartburn and/or regurgitation assessed clinically prior to endoscopy | No  | Columnar-lined oesophagus at endoscopy<br>Specialised intestinal metaplasia on biopsy | 378 | 48.2 | 66.6 | 56 (14.8)<br>9 (2.4)   | 16.1           |
| <b>Ege 2015 [58]</b>                  | Turkey, secondary and tertiary care | 2011-2013 | Interview-administered questionnaire | Presence of heartburn according to a questionnaire                                | No  | Specialised intestinal metaplasia on biopsy                                           | 180 | n/a  | 37.2 | 1 (0.6)                | Not applicable |
| <b>Sami (any frequency) 2015 [59]</b> | USA, tertiary care                  | 2011-2013 | Self-completed questionnaire         | Presence of heartburn and/or regurgitation according to GerdQ Questionnaire       | No  | Columnar-lined oesophagus at endoscopy<br>Specialised intestinal metaplasia on biopsy | 115 | n/a  | n/a  | 24 (20.9)<br>12 (10.4) | 50.0           |

|                                    |                       |           |                                 |                                                                                      |     |                                                                                                |    |     |     |                          |      |
|------------------------------------|-----------------------|-----------|---------------------------------|--------------------------------------------------------------------------------------|-----|------------------------------------------------------------------------------------------------|----|-----|-----|--------------------------|------|
| <b>Sami (weekly)<br/>2015 [59]</b> | USA, tertiary<br>care | 2011-2013 | Self-completed<br>questionnaire | Presence of heartburn<br>and/or regurgitation<br>according to GerdQ<br>Questionnaire | Yes | Columnar-lined<br>oesophagus at<br>endoscopy<br>Specialised intestinal<br>metaplasia on biopsy | 29 | n/a | n/a | 7 (24.1)<br><br>6 (20.7) | 85.7 |
|------------------------------------|-----------------------|-----------|---------------------------------|--------------------------------------------------------------------------------------|-----|------------------------------------------------------------------------------------------------|----|-----|-----|--------------------------|------|

### **Abbreviations**

GP: general practitioner; n/a: not available

**Supplementary Figure 1. Forest plot of prevalence of endoscopically suspected Barrett's oesophagus in individuals with gastro-oesophageal reflux symptoms of any frequency.**

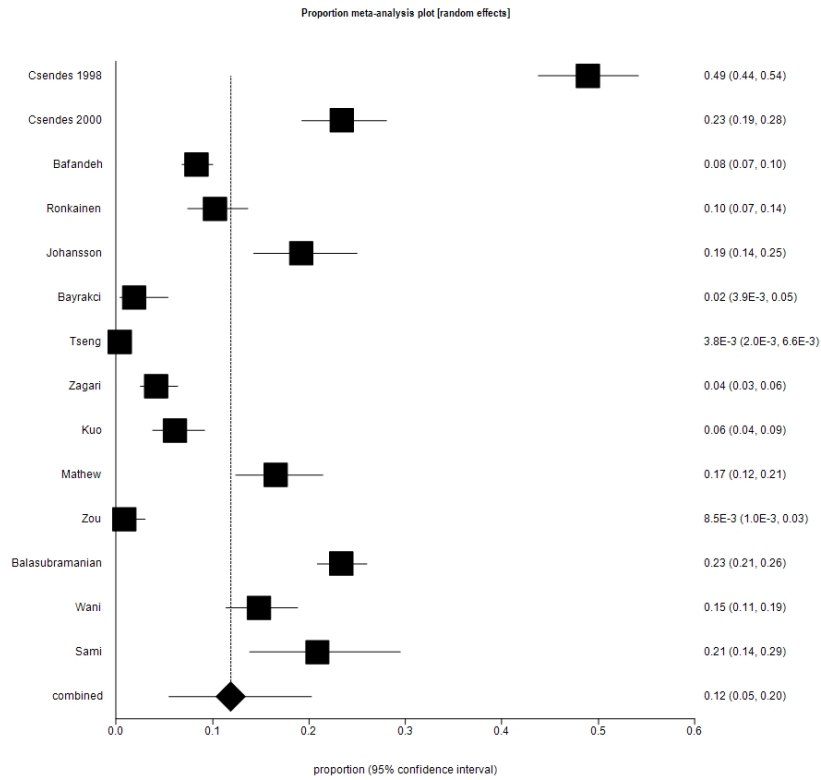

$I^2 = 99.1\%$ ,  $P < 0.001$

**Supplementary Figure 2. Forest plot of prevalence of histologically confirmed Barrett's oesophagus in individuals with gastro-oesophageal reflux symptoms of any frequency.**

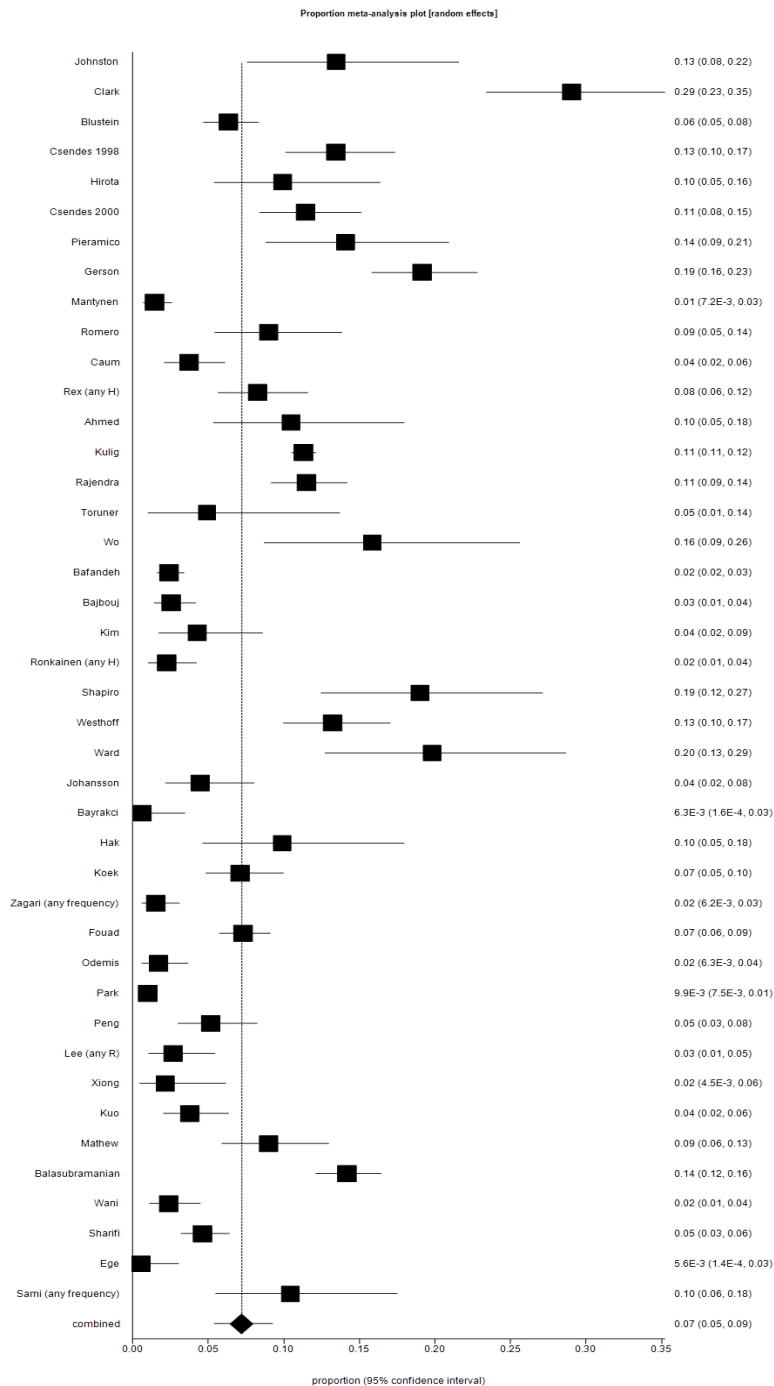

$I^2 = 97.1\%$ ,  $P < 0.001$

**Supplementary Figure 3. Forest plot of prevalence of histologically confirmed Barrett's oesophagus in individuals with GORD as per the Montreal Definition.**

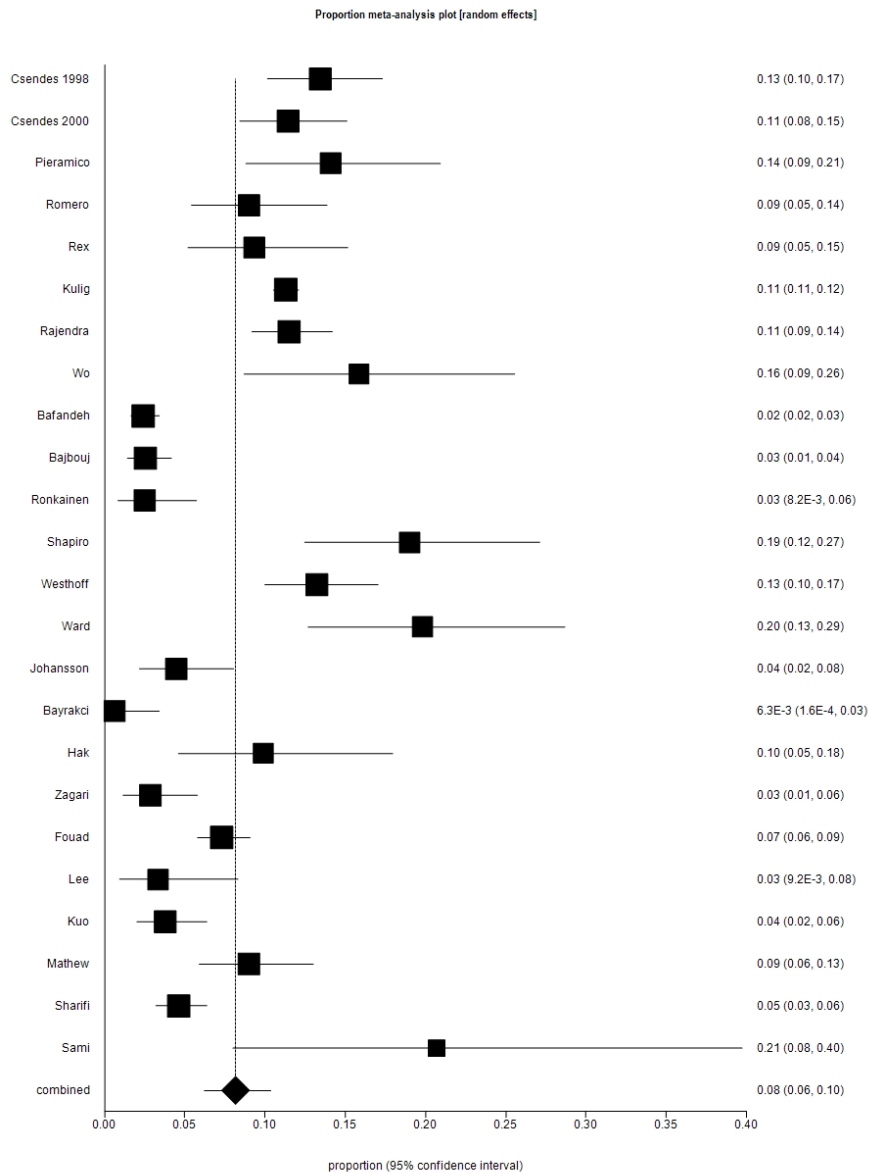

$I^2 = 93.6\%$ ,  $P < 0.001$

**Supplementary Figure 4. Forest plot of proportion of endoscopically suspected Barrett's oesophagus cases confirmed by histology among subjects with reflux symptoms of any frequency.**

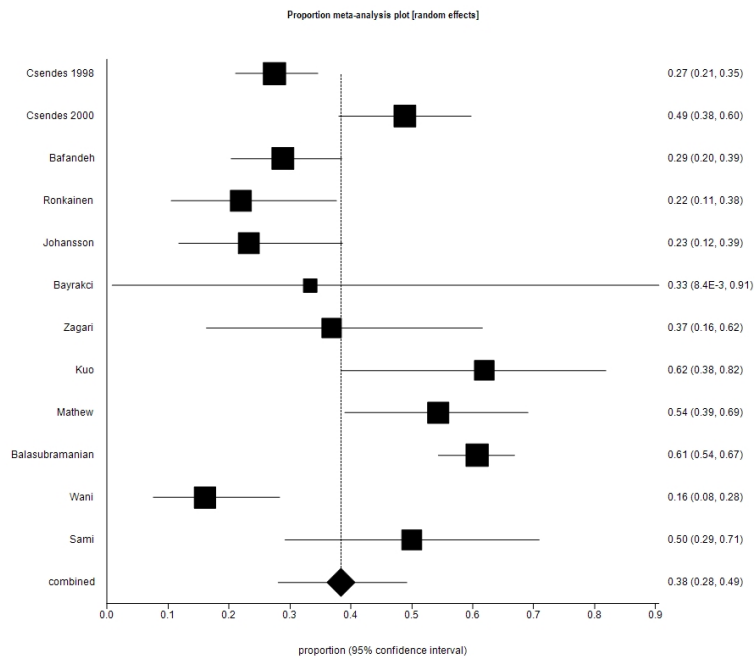

$I^2 = 89\%$ ,  $P < 0.001$



**Supplementary Figure 5. Forest plot of prevalence of dysplasia among all cases of histologically confirmed Barrett's oesophagus in individuals with gastro-oesophageal reflux symptoms of any frequency.**

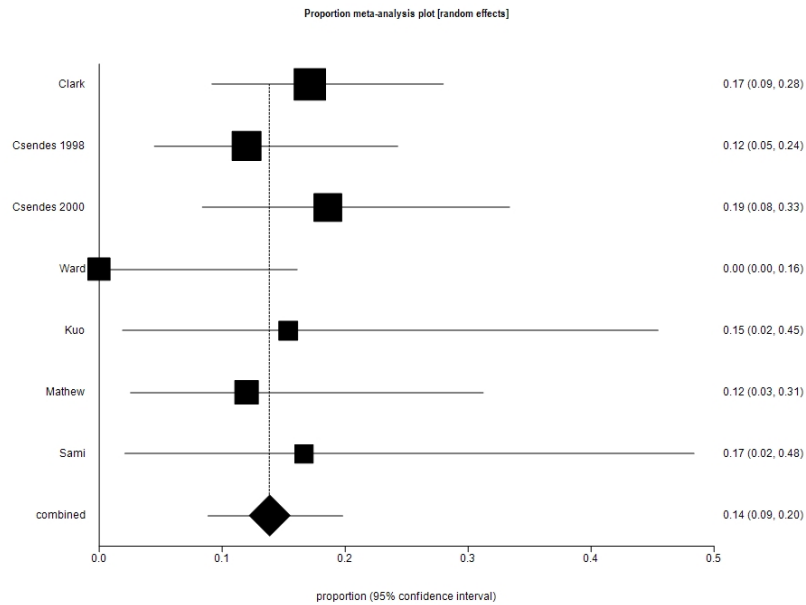

$I^2 = 30\%$ ,  $P = 0.199$
